# Supplementary material for: 3.11からの日本 復興財源に消費税増税はあまりに危険
Source: Royal Society of Chemistry journal article supplement (doi:10.1039/c9ra06499k), 2011-05-31
Supplement: c9ra06499k1.pdf [file c9ra06499k1.pdf]

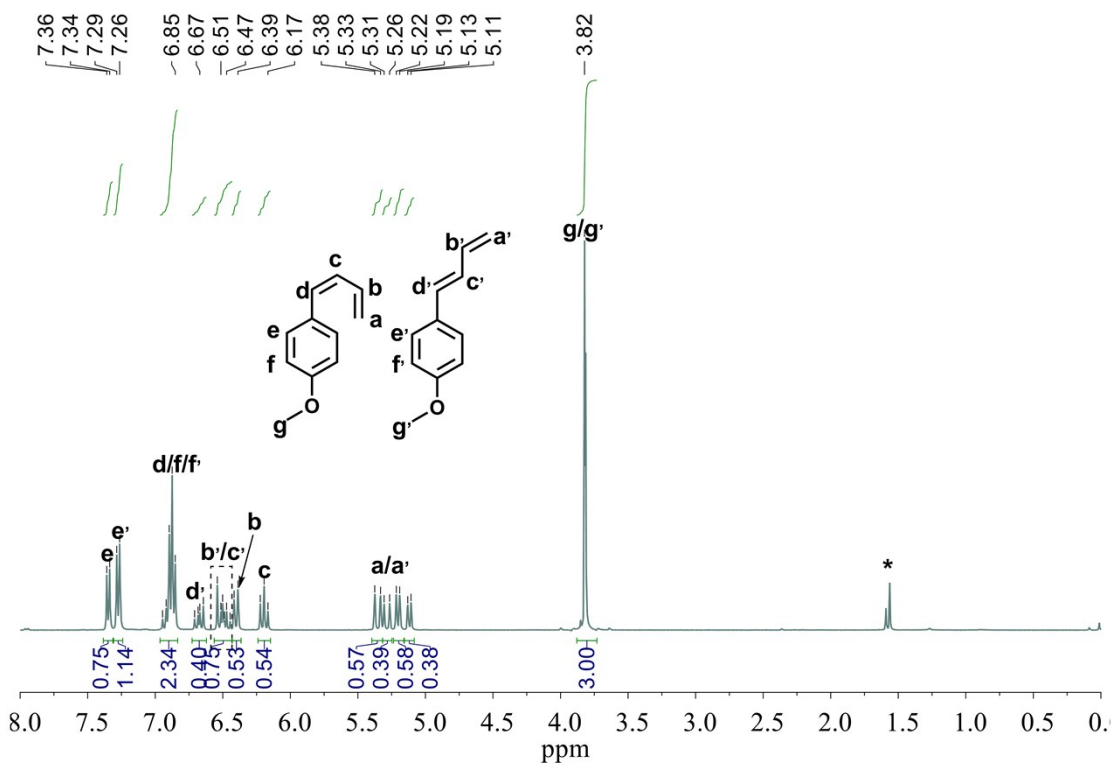

Figure S1.  $^1\text{H}$  NMR spectra of polar comonomer **a**. (\*:water)

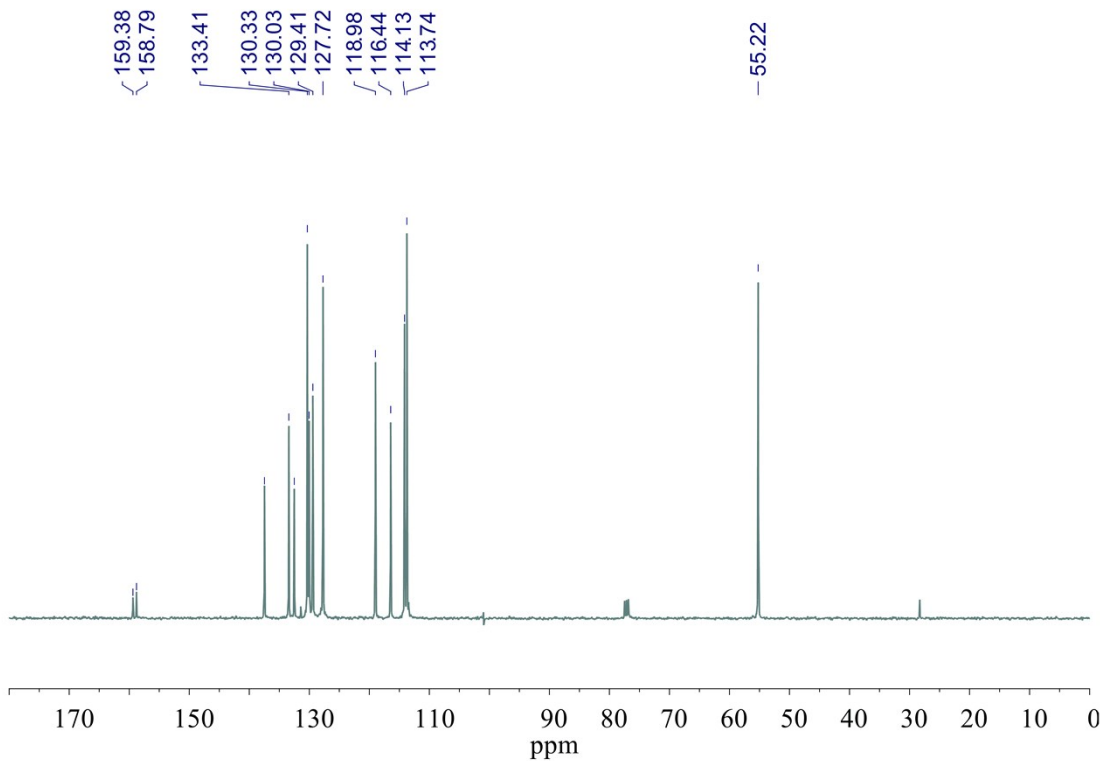

Figure S2.  $^{13}\text{C}$  NMR spectra of polar comonomer **a**.

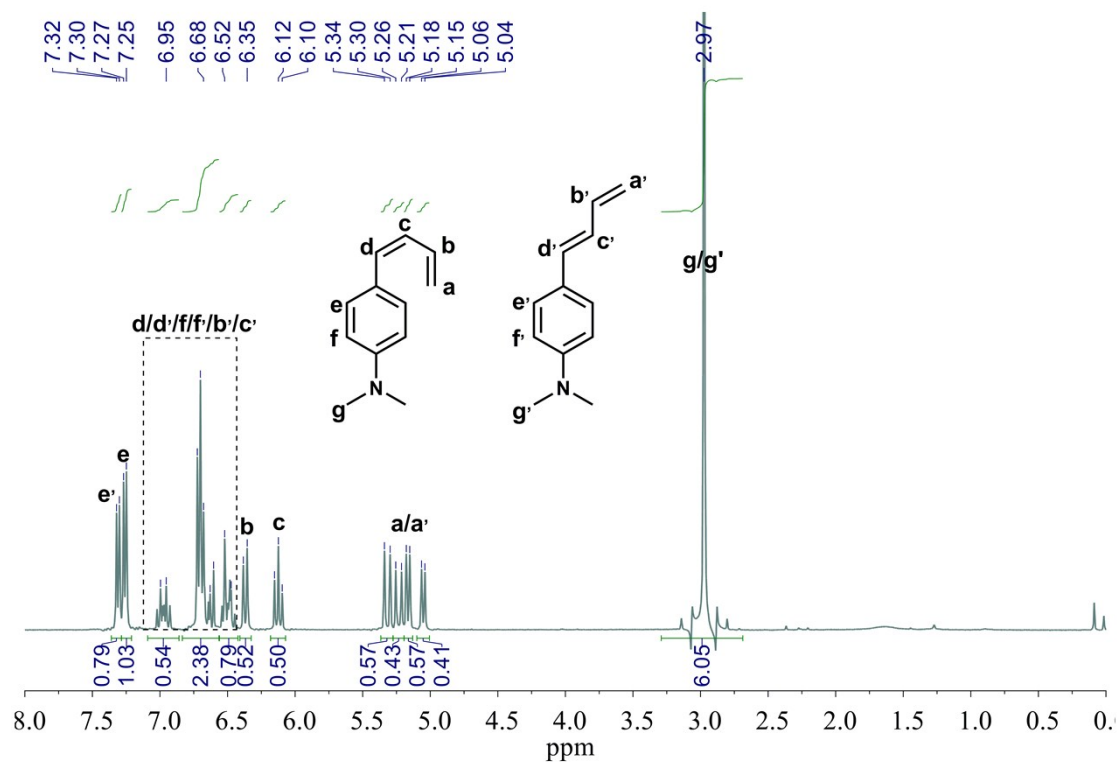

Figure S3. <sup>1</sup>H NMR spectra of polar comonomer **b**.

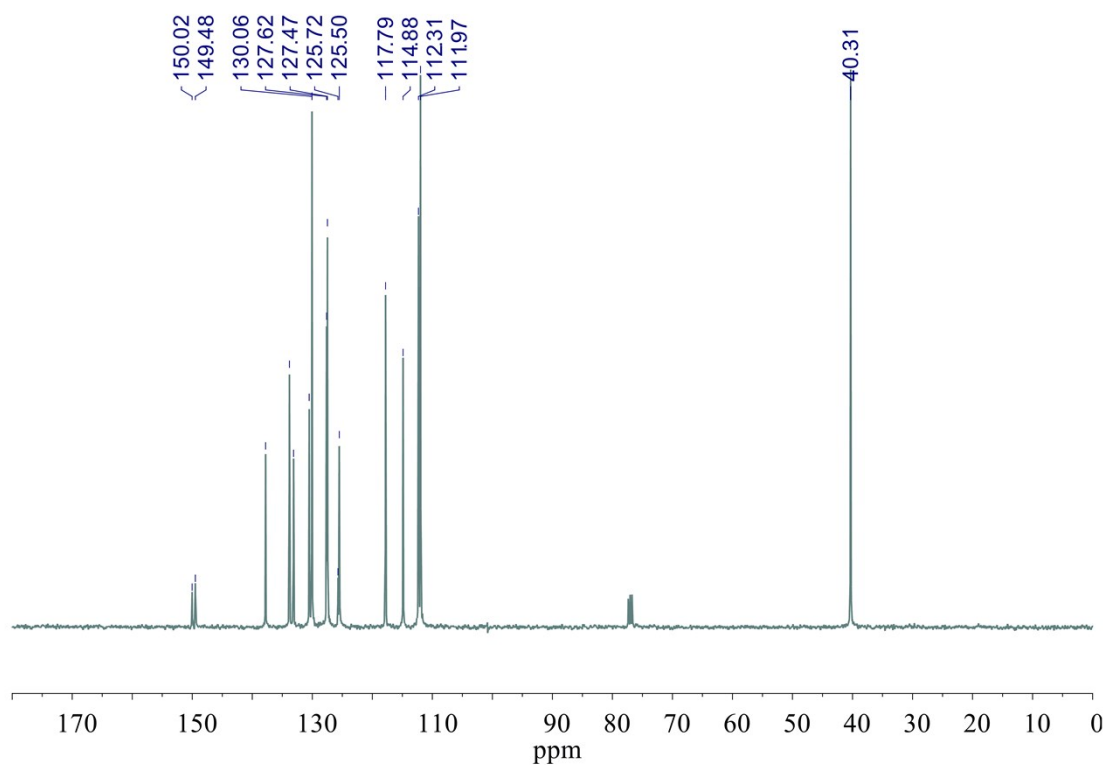

Figure S4. <sup>13</sup>C NMR spectra of polar comonomer **b**.

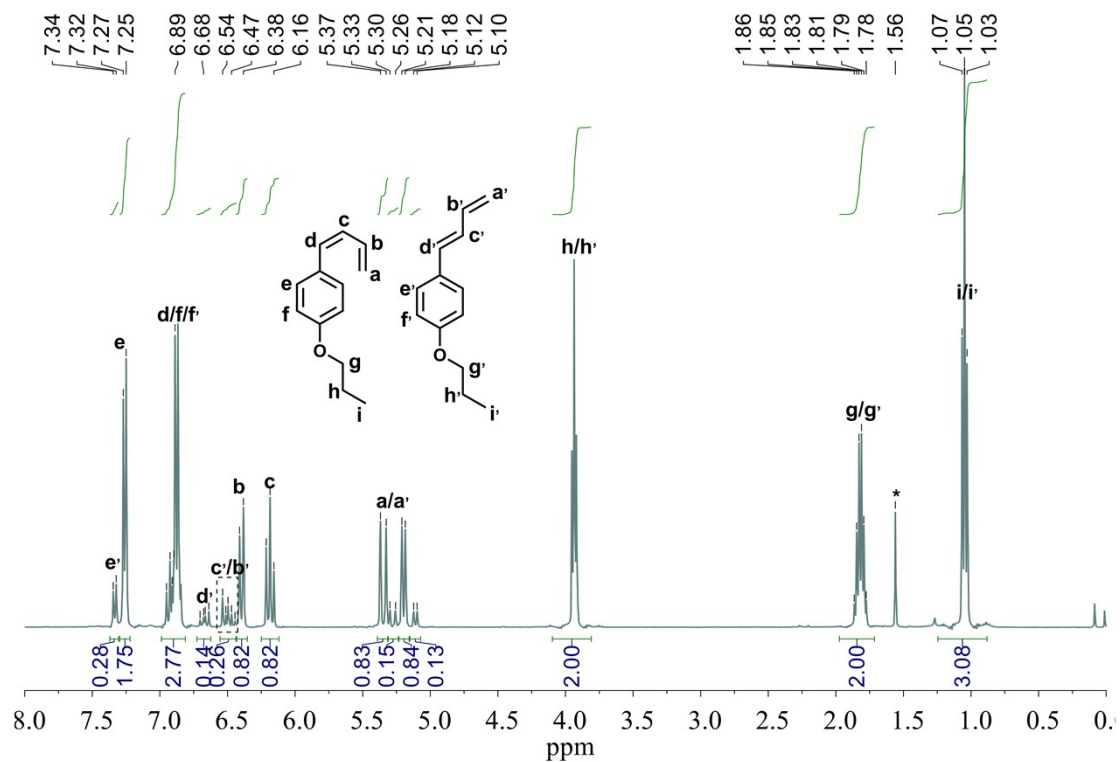

Figure S5.  $^1\text{H}$  NMR spectra of polar comonomer c. (\*:water)

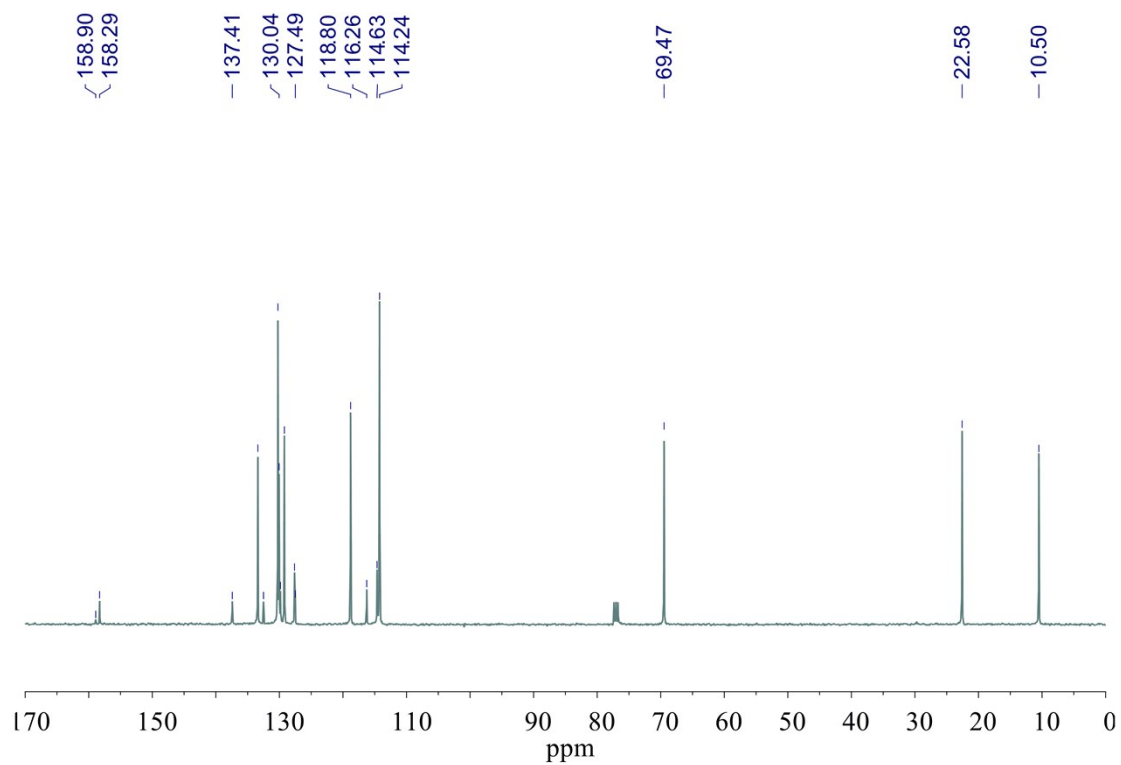

Figure S6.  $^{13}\text{C}$  NMR spectra of polar comonomer c.

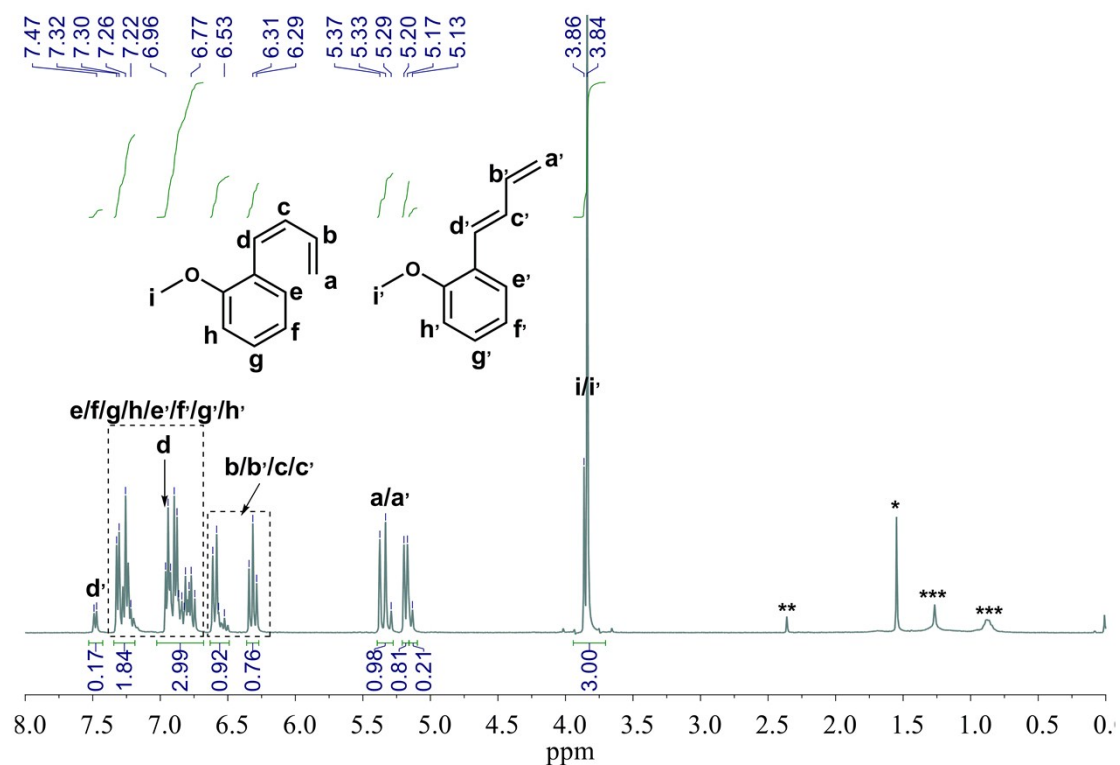

Figure S7.  $^1\text{H}$  NMR spectra of polar comonomer **d**. (\*:water; \*\*:toluene; \*\*\*:n-hexane)

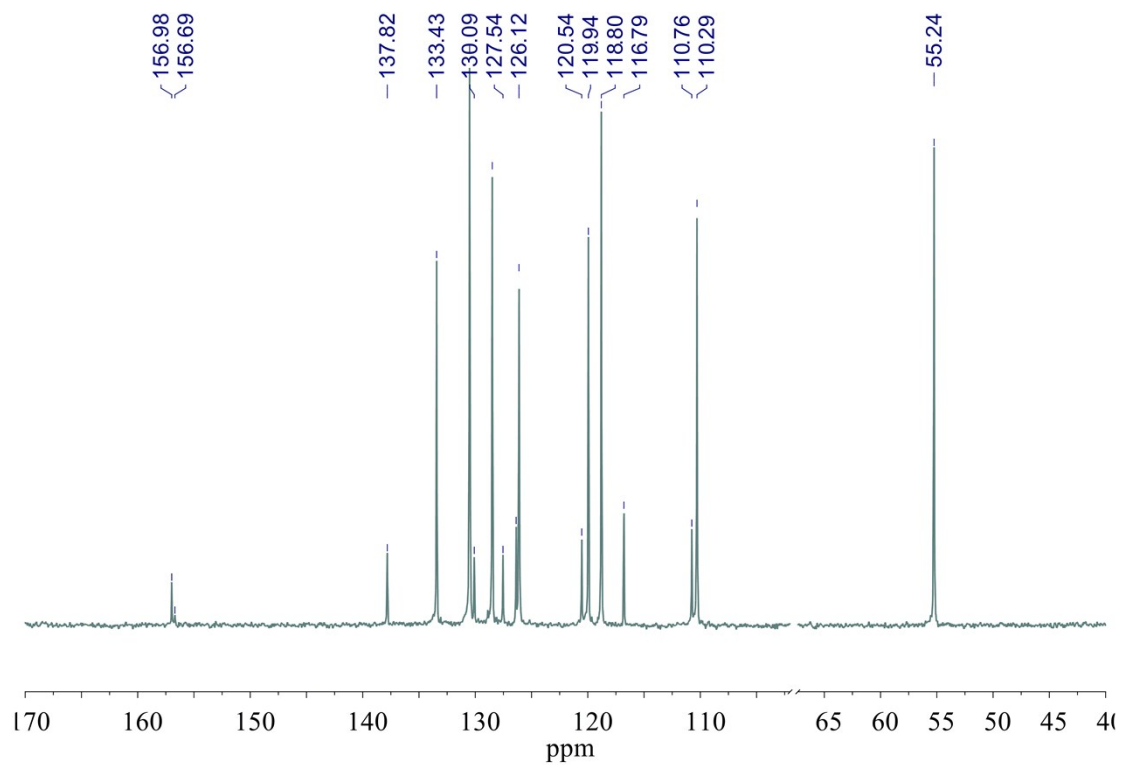

Figure S8.  $^{13}\text{C}$  NMR spectra of polar comonomer **d**.

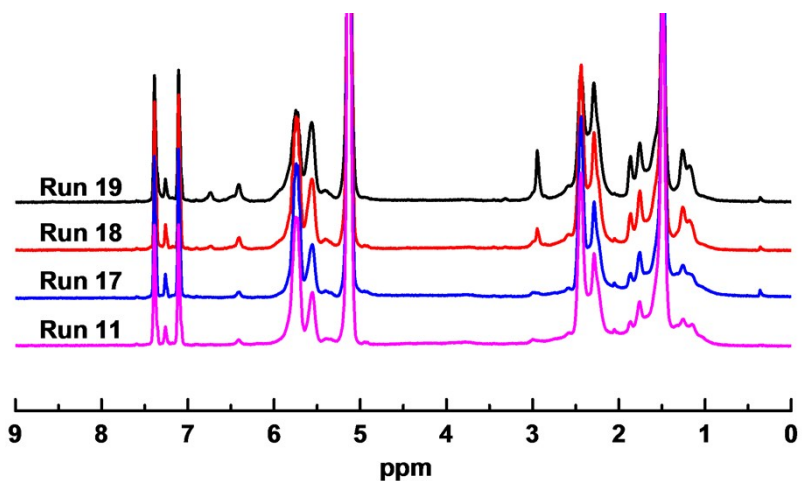

Figure S9.  $^1\text{H}$  NMR spectra of the copolymers obtained from 1,3-butadiene and comonomer **b**.

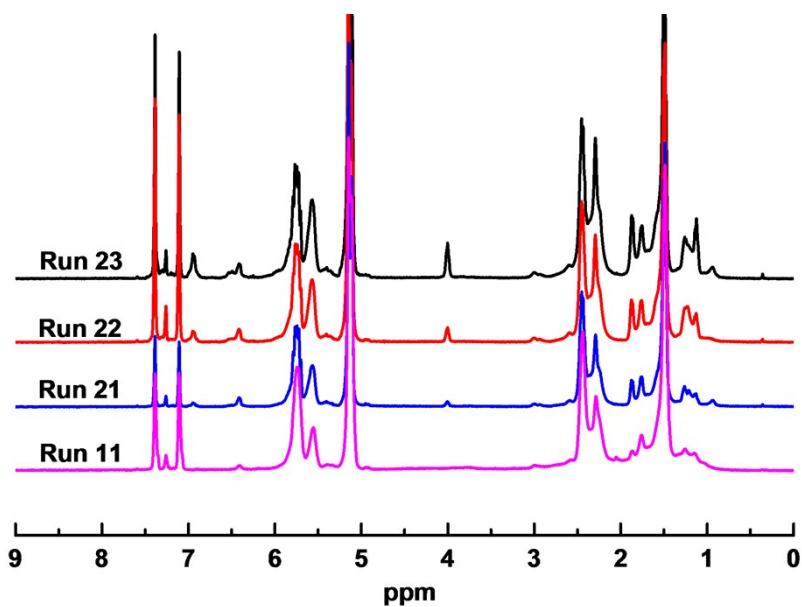

Figure S10.  $^1\text{H}$  NMR spectra of the copolymers obtained from 1,3-butadiene and comonomer **c**.

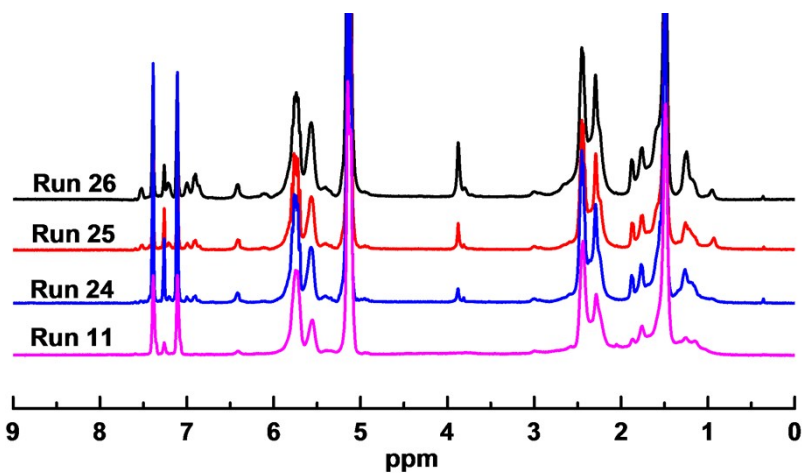

Figure S11.  $^1\text{H}$  NMR spectra of the copolymers obtained from 1,3-butadiene and comonomer **d**.

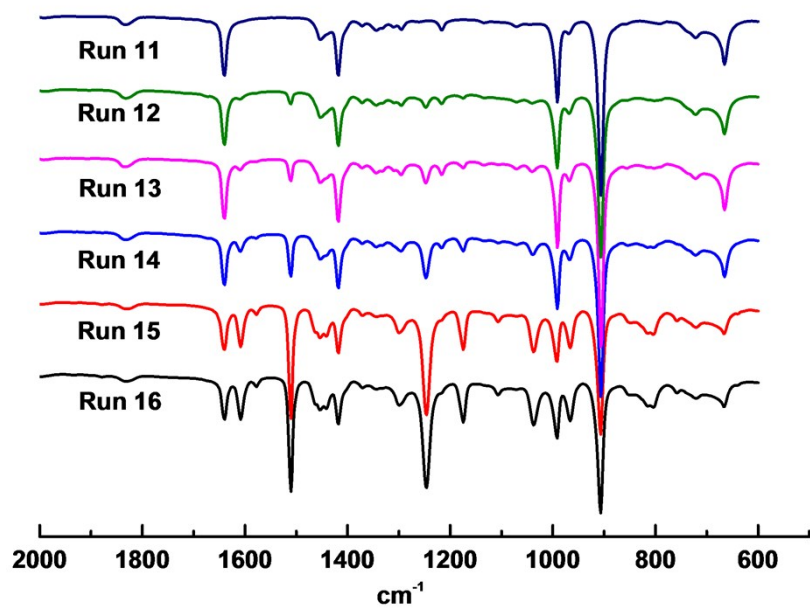

Figure S12. FTIR spectra of the copolymers obtained from 1,3-butadiene and comonomer **a**.

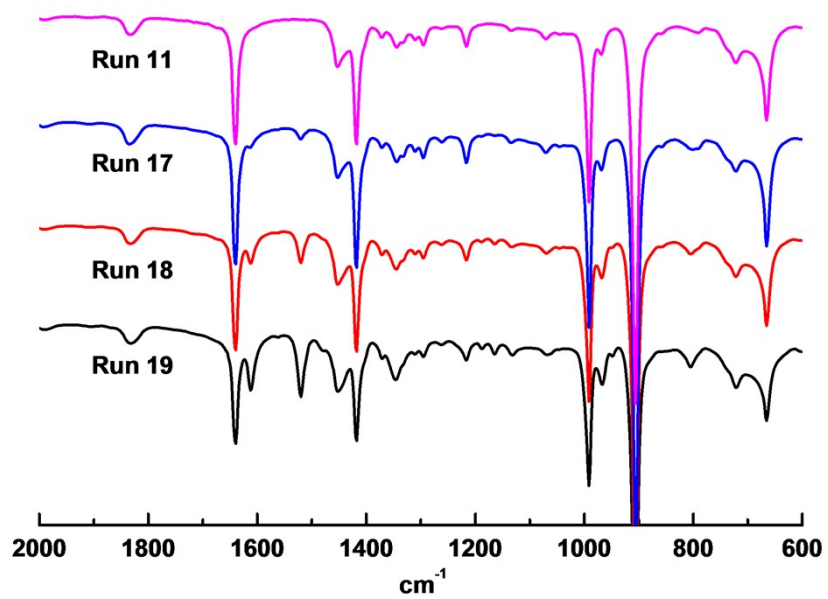

Figure S13. FTIR spectra of the copolymers obtained from 1,3-butadiene and comonomer **b**.

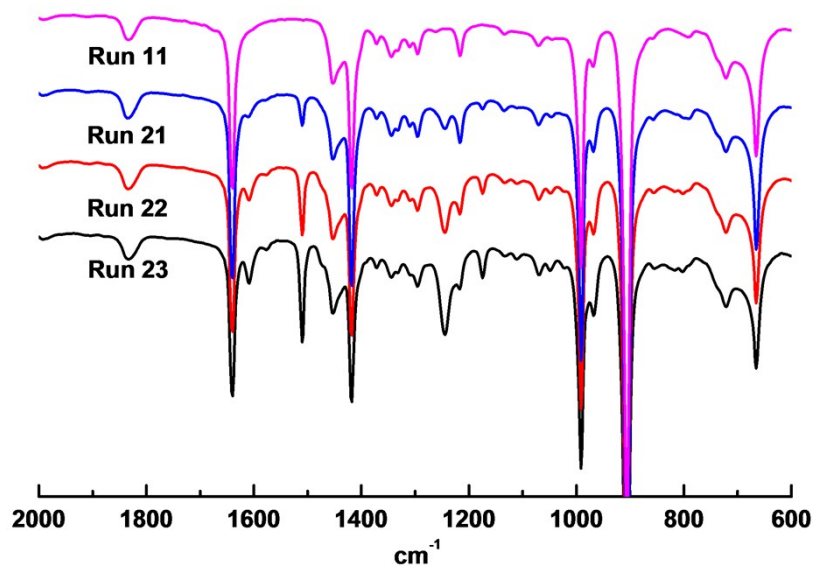

Figure S14. FTIR spectra of the copolymers obtained from 1,3-butadiene and comonomer **c**.

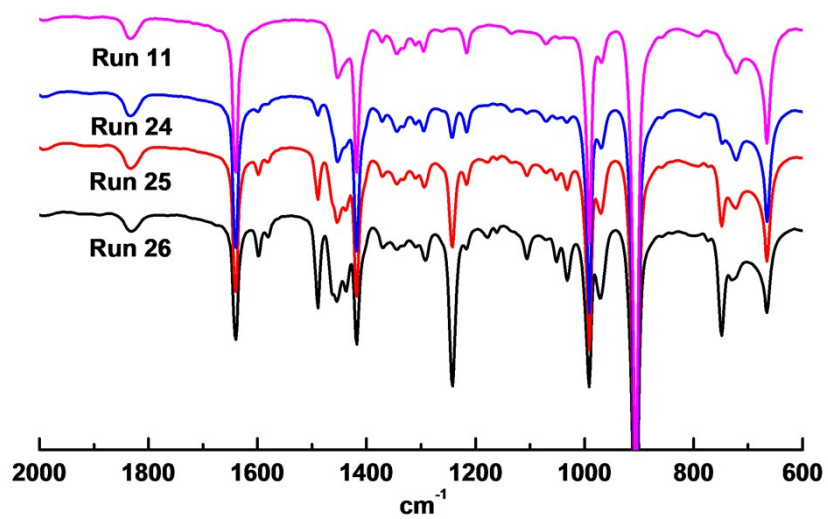

Figure S15. FTIR spectra of the copolymers obtained from 1,3-butadiene and comonomer **d**.
